# Supplementary material for: Association of school absence and exclusion with recorded neurodevelopmental disorders, mental disorders, or self-harm: a nationwide, retrospective, electronic cohort study of children and young people in Wales, UK
Source: PubMed Central journal article supplement (PMC8674147; doi:10.1016/s2215-0366(21)00367-9), 2022-01
Supplement: mmc2.pdf [file mmc2.pdf]

# THE LANCET Psychiatry

## Supplementary appendix 2

This appendix formed part of the original submission and has been peer reviewed. We post it as supplied by the authors.

Supplement to: John A, Friedmann Y, DelPozo-Banos M, et al. Association of school absence and exclusion with recorded neurodevelopmental disorders, mental disorders, or self-harm: a nationwide, retrospective, electronic cohort study of children and young people in Wales, UK. *Lancet Psychiatry* 2021; published online Nov 23. [http://dx.doi.org/10.1016/S2215-0366\(21\)00367-9](http://dx.doi.org/10.1016/S2215-0366(21)00367-9).

# Appendix

Supplementary figure 1: Comparison of the sex distribution in those with missing GP data and those with GP data (n=437,412).

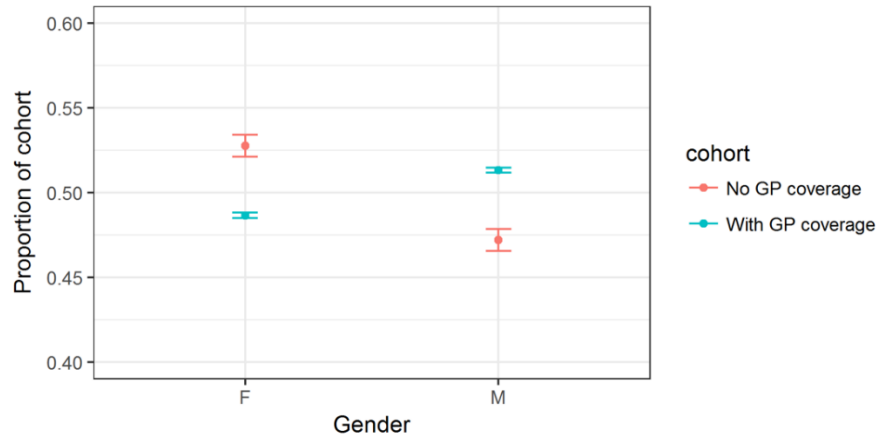

Supplementary figure 2: Comparison of the deprivation distribution in two groups in with missing GP data and those with GP data. Proportion for each group by deprivation quintiles is presented, with quintile 5 being most deprived.

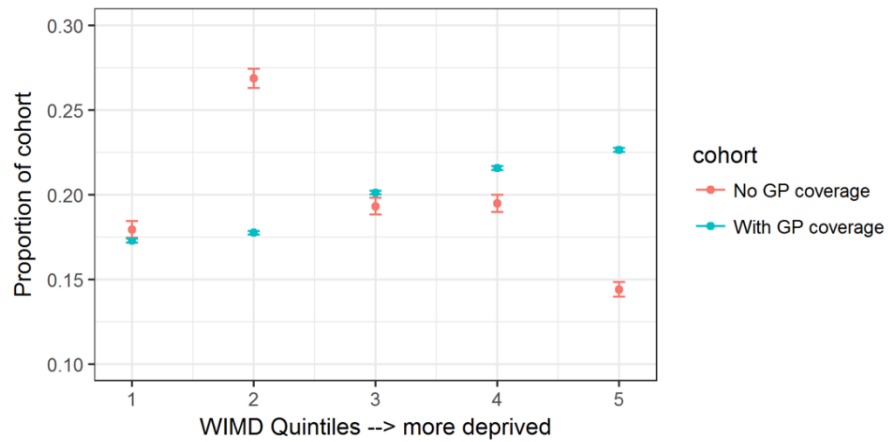

Supplementary figure 3: Proportion of our cohort population with and without a mental disorder (MH), by the number of years contributed to the analysis.

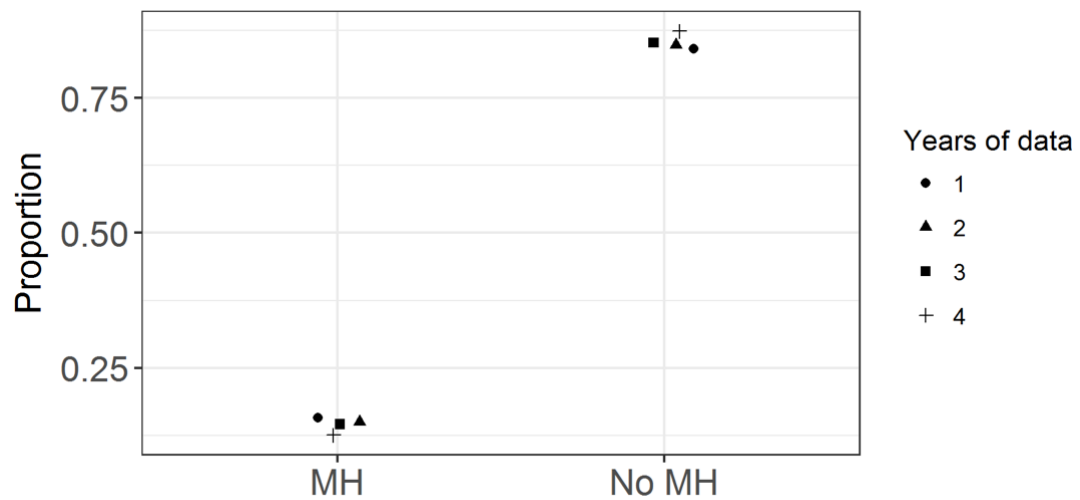

*Supplementary figure 4: proportion of our cohort population in each deprivation WIMD) quintile, by the number of years contributed to the analysis. Quintile 5 is most deprived.*

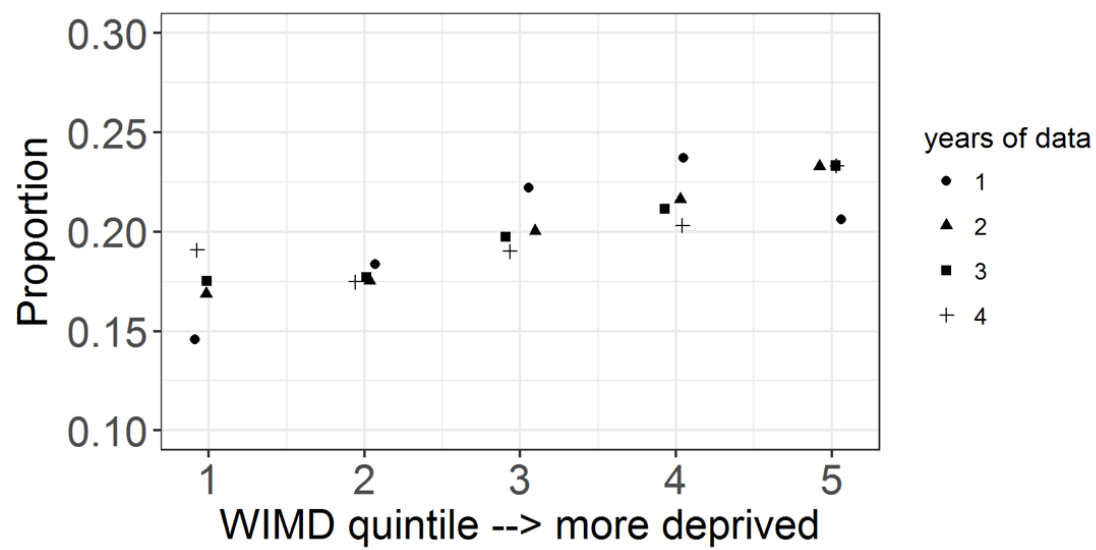

Supplementary figure 5: proportion of our cohort population by gender and the number of years contributed to the analysis.

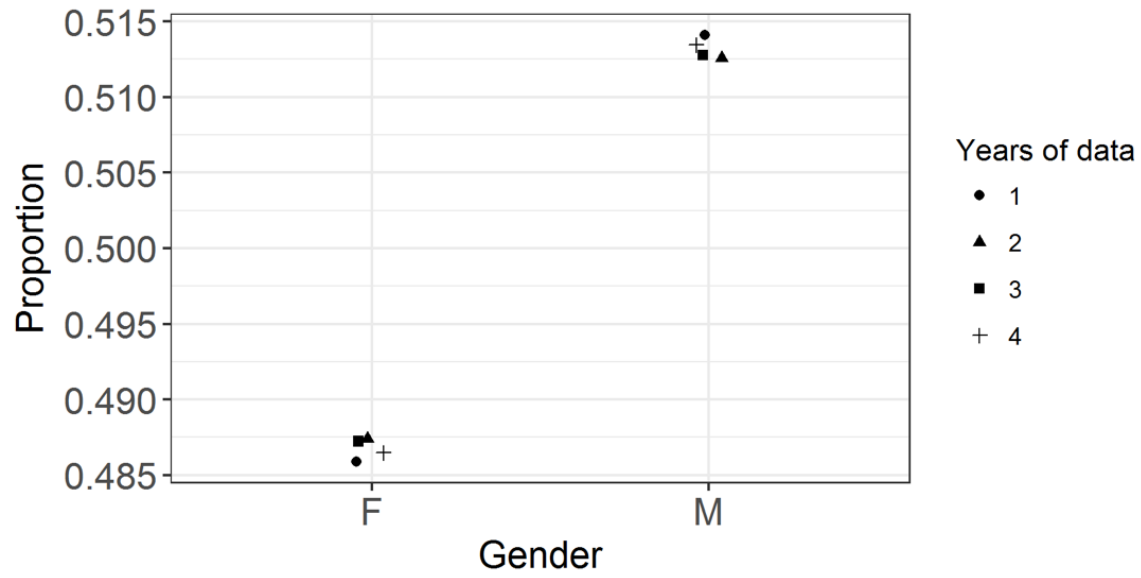

**Supplementary figure 6: Boxplots describing the distribution of absence rates in those not excluded (0) and those excluded (1).**

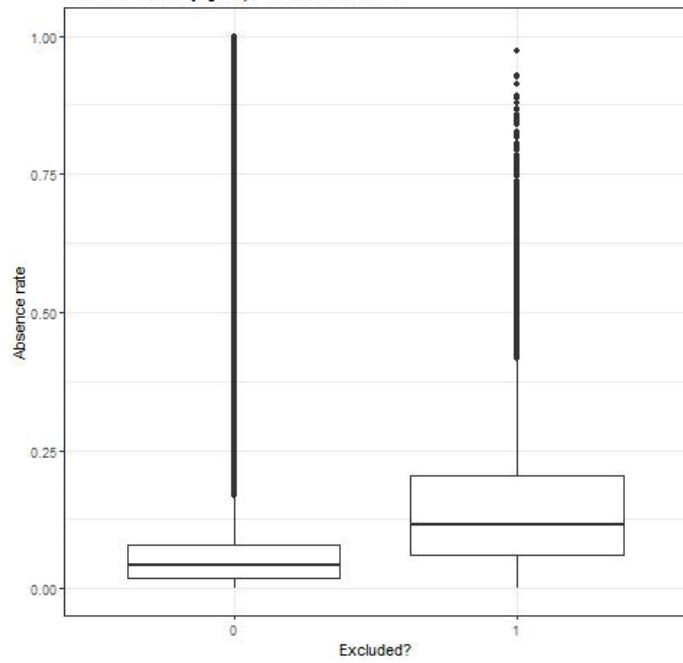

**Supplementary Table 1: Datasets used in our analysis.**

| Database                                                              | Description                                                                                                                                                                                                                                                                                                                                                                                                                                                                                                                                                                                                                                                                                                                                                                                                                                                                                                                       | Covariates and outcomes                                             |
|-----------------------------------------------------------------------|-----------------------------------------------------------------------------------------------------------------------------------------------------------------------------------------------------------------------------------------------------------------------------------------------------------------------------------------------------------------------------------------------------------------------------------------------------------------------------------------------------------------------------------------------------------------------------------------------------------------------------------------------------------------------------------------------------------------------------------------------------------------------------------------------------------------------------------------------------------------------------------------------------------------------------------|---------------------------------------------------------------------|
| The Welsh Demographic Service Dataset WDS <sup>1</sup>                | An administrative register that includes anonymised demographic characteristics of people registered with GP practices in Wales                                                                                                                                                                                                                                                                                                                                                                                                                                                                                                                                                                                                                                                                                                                                                                                                   | age, sex (male or female)                                           |
| Welsh Index of Multiple Deprivation (WIMD) <sup>2</sup>               | The official measure of deprivation for close to 2000 small areas in Wales. WIMD is made up of eight separate domains of deprivation: income; employment; health; education; housing; access to services; environment; and community safety.                                                                                                                                                                                                                                                                                                                                                                                                                                                                                                                                                                                                                                                                                      | Deprivation quintiles, 5 is the most deprived.                      |
| The Office for National Statistics (ONS) deaths register <sup>3</sup> | A register of all deaths relating to Welsh residents, including those that died outside Wales                                                                                                                                                                                                                                                                                                                                                                                                                                                                                                                                                                                                                                                                                                                                                                                                                                     |                                                                     |
| The Welsh Longitudinal General Practice Database – WLGP <sup>4</sup>  | contains attendance and clinical information for all general practices who agreed to share their data (at the time of analysis 330/412 General Practices were registered with SAIL covering ~79% of the Welsh population). Clinical information including symptoms, investigations, diagnoses and prescribed medication is coded using Read Codes, a standard vocabulary for clinicians to record patient findings and procedures, in health and social care IT systems across primary and secondary care in the United Kingdom                                                                                                                                                                                                                                                                                                                                                                                                   | Mental health                                                       |
| Patient Episode Database for Wales (PEDW) <sup>5</sup>                | contains all inpatient and day case activity undertaken in NHS Wales plus data on Welsh residents treated in English Trusts. This includes demographic, clinical and administrative detail, such as age and sex of patient diagnoses and operative procedures. Clinical information in PEDW is coded using ICD-10 (World Health Organisation, 2016), an international standard for diagnostic classification of diseases and other health conditions                                                                                                                                                                                                                                                                                                                                                                                                                                                                              | Mental health                                                       |
| Welsh Government Education Dataset <sup>6</sup>                       | includes records for all children registered at state schools in Wales or educated in settings other than school. It holds information on schools, examination results, attendance per year, exclusions per year, eligibility for free school meals, receipt of statement of special educational needs (SEN) and education other than at school (EOTAS). Exclusion records were available from academic year 2012/13. Exclusions were categorised within the dataset as permanent, fixed or lunchtime. A child will have Special Educational Needs (SEN) if they have a learning difficulty or disability which requires special education provision to be made for them. There are several levels of provision in schools. There are several levels of provision in schools including curriculum modification, targeted differentiation, small group provision, additional support in class and access to specialised equipment. | Absenteeism and exclusions per academic year per pupil, SEN status. |

1 Public Health Wales Observatory. (2017a). *Welsh Demographics Service (WDS)*. <http://www.publichealthwalesobservatory.wales.nhs.uk/wds>

2 Public Health Wales Observatory. (2017b). *Welsh Index of Multiple Deprivation (WIMD)*. <http://www.publichealthwalesobservatory.wales.nhs.uk/wimd>

3 *Annual District Death Extract (ADDE)*. (2017). <https://saildatabank.com/saildata/sail-datasets/annual-district-death-extract-adde/>

4 Primary Care GP dataset. (2018). <https://saildatabank.com/saildata/sail-datasets/primary-care-gp-dataset/>

5 PEDW. (2018). <http://www.infoandstats.wales.nhs.uk/page.cfm?pid=41009&orgid=869>

6 <https://data.ukserp.ac.uk/Asset/View/35>

## Supplementary table 2: references for clinical codes.

|                                                                                                                                                                                                                                                                                                                                                                                                                                                                                                                                                                                                                                                                                                                                                                                                                                                                                                                                                                                                                                                                                                                                                                                                                                                                                                                                                                                                                                                                                                                                                                                                                                                                                                                                                                                                                                                                                                                                                                                                                                                                                                                                                                                                                                                                                                                                                                                                                                                                                                                                                                                                                                                                                                                                                                                                                                                                                                                                                                                                                                                                                                                                                                                                                                                                                                                                                                                                                                                                                                                                                                                                                                                                                                                                                                                                                                                                                                                                                                                                                                                                                                                                                                           |
|---------------------------------------------------------------------------------------------------------------------------------------------------------------------------------------------------------------------------------------------------------------------------------------------------------------------------------------------------------------------------------------------------------------------------------------------------------------------------------------------------------------------------------------------------------------------------------------------------------------------------------------------------------------------------------------------------------------------------------------------------------------------------------------------------------------------------------------------------------------------------------------------------------------------------------------------------------------------------------------------------------------------------------------------------------------------------------------------------------------------------------------------------------------------------------------------------------------------------------------------------------------------------------------------------------------------------------------------------------------------------------------------------------------------------------------------------------------------------------------------------------------------------------------------------------------------------------------------------------------------------------------------------------------------------------------------------------------------------------------------------------------------------------------------------------------------------------------------------------------------------------------------------------------------------------------------------------------------------------------------------------------------------------------------------------------------------------------------------------------------------------------------------------------------------------------------------------------------------------------------------------------------------------------------------------------------------------------------------------------------------------------------------------------------------------------------------------------------------------------------------------------------------------------------------------------------------------------------------------------------------------------------------------------------------------------------------------------------------------------------------------------------------------------------------------------------------------------------------------------------------------------------------------------------------------------------------------------------------------------------------------------------------------------------------------------------------------------------------------------------------------------------------------------------------------------------------------------------------------------------------------------------------------------------------------------------------------------------------------------------------------------------------------------------------------------------------------------------------------------------------------------------------------------------------------------------------------------------------------------------------------------------------------------------------------------------------------------------------------------------------------------------------------------------------------------------------------------------------------------------------------------------------------------------------------------------------------------------------------------------------------------------------------------------------------------------------------------------------------------------------------------------------------------------------|
| Learning difficulties <sup>1,1a</sup>                                                                                                                                                                                                                                                                                                                                                                                                                                                                                                                                                                                                                                                                                                                                                                                                                                                                                                                                                                                                                                                                                                                                                                                                                                                                                                                                                                                                                                                                                                                                                                                                                                                                                                                                                                                                                                                                                                                                                                                                                                                                                                                                                                                                                                                                                                                                                                                                                                                                                                                                                                                                                                                                                                                                                                                                                                                                                                                                                                                                                                                                                                                                                                                                                                                                                                                                                                                                                                                                                                                                                                                                                                                                                                                                                                                                                                                                                                                                                                                                                                                                                                                                     |
| ADHD <sup>2</sup>                                                                                                                                                                                                                                                                                                                                                                                                                                                                                                                                                                                                                                                                                                                                                                                                                                                                                                                                                                                                                                                                                                                                                                                                                                                                                                                                                                                                                                                                                                                                                                                                                                                                                                                                                                                                                                                                                                                                                                                                                                                                                                                                                                                                                                                                                                                                                                                                                                                                                                                                                                                                                                                                                                                                                                                                                                                                                                                                                                                                                                                                                                                                                                                                                                                                                                                                                                                                                                                                                                                                                                                                                                                                                                                                                                                                                                                                                                                                                                                                                                                                                                                                                         |
| ASD <sup>3</sup>                                                                                                                                                                                                                                                                                                                                                                                                                                                                                                                                                                                                                                                                                                                                                                                                                                                                                                                                                                                                                                                                                                                                                                                                                                                                                                                                                                                                                                                                                                                                                                                                                                                                                                                                                                                                                                                                                                                                                                                                                                                                                                                                                                                                                                                                                                                                                                                                                                                                                                                                                                                                                                                                                                                                                                                                                                                                                                                                                                                                                                                                                                                                                                                                                                                                                                                                                                                                                                                                                                                                                                                                                                                                                                                                                                                                                                                                                                                                                                                                                                                                                                                                                          |
| Anxiety <sup>4,6</sup>                                                                                                                                                                                                                                                                                                                                                                                                                                                                                                                                                                                                                                                                                                                                                                                                                                                                                                                                                                                                                                                                                                                                                                                                                                                                                                                                                                                                                                                                                                                                                                                                                                                                                                                                                                                                                                                                                                                                                                                                                                                                                                                                                                                                                                                                                                                                                                                                                                                                                                                                                                                                                                                                                                                                                                                                                                                                                                                                                                                                                                                                                                                                                                                                                                                                                                                                                                                                                                                                                                                                                                                                                                                                                                                                                                                                                                                                                                                                                                                                                                                                                                                                                    |
| Bipolar disorder <sup>5</sup>                                                                                                                                                                                                                                                                                                                                                                                                                                                                                                                                                                                                                                                                                                                                                                                                                                                                                                                                                                                                                                                                                                                                                                                                                                                                                                                                                                                                                                                                                                                                                                                                                                                                                                                                                                                                                                                                                                                                                                                                                                                                                                                                                                                                                                                                                                                                                                                                                                                                                                                                                                                                                                                                                                                                                                                                                                                                                                                                                                                                                                                                                                                                                                                                                                                                                                                                                                                                                                                                                                                                                                                                                                                                                                                                                                                                                                                                                                                                                                                                                                                                                                                                             |
| Conduct disorder <sup>6</sup>                                                                                                                                                                                                                                                                                                                                                                                                                                                                                                                                                                                                                                                                                                                                                                                                                                                                                                                                                                                                                                                                                                                                                                                                                                                                                                                                                                                                                                                                                                                                                                                                                                                                                                                                                                                                                                                                                                                                                                                                                                                                                                                                                                                                                                                                                                                                                                                                                                                                                                                                                                                                                                                                                                                                                                                                                                                                                                                                                                                                                                                                                                                                                                                                                                                                                                                                                                                                                                                                                                                                                                                                                                                                                                                                                                                                                                                                                                                                                                                                                                                                                                                                             |
| Depression <sup>4,4a</sup>                                                                                                                                                                                                                                                                                                                                                                                                                                                                                                                                                                                                                                                                                                                                                                                                                                                                                                                                                                                                                                                                                                                                                                                                                                                                                                                                                                                                                                                                                                                                                                                                                                                                                                                                                                                                                                                                                                                                                                                                                                                                                                                                                                                                                                                                                                                                                                                                                                                                                                                                                                                                                                                                                                                                                                                                                                                                                                                                                                                                                                                                                                                                                                                                                                                                                                                                                                                                                                                                                                                                                                                                                                                                                                                                                                                                                                                                                                                                                                                                                                                                                                                                                |
| Eating disorders <sup>8,9</sup>                                                                                                                                                                                                                                                                                                                                                                                                                                                                                                                                                                                                                                                                                                                                                                                                                                                                                                                                                                                                                                                                                                                                                                                                                                                                                                                                                                                                                                                                                                                                                                                                                                                                                                                                                                                                                                                                                                                                                                                                                                                                                                                                                                                                                                                                                                                                                                                                                                                                                                                                                                                                                                                                                                                                                                                                                                                                                                                                                                                                                                                                                                                                                                                                                                                                                                                                                                                                                                                                                                                                                                                                                                                                                                                                                                                                                                                                                                                                                                                                                                                                                                                                           |
| Other psychotic disorders <sup>5</sup>                                                                                                                                                                                                                                                                                                                                                                                                                                                                                                                                                                                                                                                                                                                                                                                                                                                                                                                                                                                                                                                                                                                                                                                                                                                                                                                                                                                                                                                                                                                                                                                                                                                                                                                                                                                                                                                                                                                                                                                                                                                                                                                                                                                                                                                                                                                                                                                                                                                                                                                                                                                                                                                                                                                                                                                                                                                                                                                                                                                                                                                                                                                                                                                                                                                                                                                                                                                                                                                                                                                                                                                                                                                                                                                                                                                                                                                                                                                                                                                                                                                                                                                                    |
| <b>Read codes:</b> Eu23z, Eu231, Eu230, Eu232, Eu23., Eu328, Eu23y, Eu233, Eu32A, Eu333, Eu323, Eu329, E131., E133., E11., E13y1, 146H., E1y., E13z., E1z., 9H8., E11zz, E13., E13y., E13yz, E11z., E134., E13y0, E132., E130., E1134, 8Hhs., E1124, E11z0                                                                                                                                                                                                                                                                                                                                                                                                                                                                                                                                                                                                                                                                                                                                                                                                                                                                                                                                                                                                                                                                                                                                                                                                                                                                                                                                                                                                                                                                                                                                                                                                                                                                                                                                                                                                                                                                                                                                                                                                                                                                                                                                                                                                                                                                                                                                                                                                                                                                                                                                                                                                                                                                                                                                                                                                                                                                                                                                                                                                                                                                                                                                                                                                                                                                                                                                                                                                                                                                                                                                                                                                                                                                                                                                                                                                                                                                                                                |
| <b>ICD-10:</b> F23., F230., F231., F232., F233., F238., F239., F28., F28X., F29., F29X., F30., F300., F301., F308., F309., F323., F333., F38., F380., F381., F388., F39., F39X.                                                                                                                                                                                                                                                                                                                                                                                                                                                                                                                                                                                                                                                                                                                                                                                                                                                                                                                                                                                                                                                                                                                                                                                                                                                                                                                                                                                                                                                                                                                                                                                                                                                                                                                                                                                                                                                                                                                                                                                                                                                                                                                                                                                                                                                                                                                                                                                                                                                                                                                                                                                                                                                                                                                                                                                                                                                                                                                                                                                                                                                                                                                                                                                                                                                                                                                                                                                                                                                                                                                                                                                                                                                                                                                                                                                                                                                                                                                                                                                           |
| Schizophrenia <sup>3</sup>                                                                                                                                                                                                                                                                                                                                                                                                                                                                                                                                                                                                                                                                                                                                                                                                                                                                                                                                                                                                                                                                                                                                                                                                                                                                                                                                                                                                                                                                                                                                                                                                                                                                                                                                                                                                                                                                                                                                                                                                                                                                                                                                                                                                                                                                                                                                                                                                                                                                                                                                                                                                                                                                                                                                                                                                                                                                                                                                                                                                                                                                                                                                                                                                                                                                                                                                                                                                                                                                                                                                                                                                                                                                                                                                                                                                                                                                                                                                                                                                                                                                                                                                                |
| Alcohol misuse <sup>11</sup>                                                                                                                                                                                                                                                                                                                                                                                                                                                                                                                                                                                                                                                                                                                                                                                                                                                                                                                                                                                                                                                                                                                                                                                                                                                                                                                                                                                                                                                                                                                                                                                                                                                                                                                                                                                                                                                                                                                                                                                                                                                                                                                                                                                                                                                                                                                                                                                                                                                                                                                                                                                                                                                                                                                                                                                                                                                                                                                                                                                                                                                                                                                                                                                                                                                                                                                                                                                                                                                                                                                                                                                                                                                                                                                                                                                                                                                                                                                                                                                                                                                                                                                                              |
| Drug misuse <sup>11</sup>                                                                                                                                                                                                                                                                                                                                                                                                                                                                                                                                                                                                                                                                                                                                                                                                                                                                                                                                                                                                                                                                                                                                                                                                                                                                                                                                                                                                                                                                                                                                                                                                                                                                                                                                                                                                                                                                                                                                                                                                                                                                                                                                                                                                                                                                                                                                                                                                                                                                                                                                                                                                                                                                                                                                                                                                                                                                                                                                                                                                                                                                                                                                                                                                                                                                                                                                                                                                                                                                                                                                                                                                                                                                                                                                                                                                                                                                                                                                                                                                                                                                                                                                                 |
| Self-harm <sup>5,9,10</sup>                                                                                                                                                                                                                                                                                                                                                                                                                                                                                                                                                                                                                                                                                                                                                                                                                                                                                                                                                                                                                                                                                                                                                                                                                                                                                                                                                                                                                                                                                                                                                                                                                                                                                                                                                                                                                                                                                                                                                                                                                                                                                                                                                                                                                                                                                                                                                                                                                                                                                                                                                                                                                                                                                                                                                                                                                                                                                                                                                                                                                                                                                                                                                                                                                                                                                                                                                                                                                                                                                                                                                                                                                                                                                                                                                                                                                                                                                                                                                                                                                                                                                                                                               |
| <p>1 Burt, A., Maconochie, N., Doyle, P., &amp; Roman, E. (2004). Learning difficulties in children born to male UK nuclear industry employees; analysis from the nuclear industry family study. <i>Occupational and Environmental Medicine</i>, 61(9), 786–789. <a href="https://doi.org/10.1136/oem.2004.012906">https://doi.org/10.1136/oem.2004.012906</a></p> <p>1a Brophy, Sinead et al. “Characteristics of Children Prescribed Antipsychotics: Analysis of Routinely Collected Data.” <i>Journal of child and adolescent psychopharmacology</i> vol. 28,3 (2018): 180-191. doi:10.1089/cap.2017.0003</p> <p>2 Langley, 2019, private com. (?)</p> <p>3 Underwood, J. F. G., Kendall, K. M., Berrett, J., Lewis, C., Anney, R., van den Bree, M. B. M., &amp; Hall, J. (2019). Autism spectrum disorder diagnosis in adults: phenotype and genotype findings from a clinically derived cohort. <i>British Journal of Psychiatry</i>, 215(5), 647–653. <a href="https://doi.org/10.1192/bjp.2019.30">https://doi.org/10.1192/bjp.2019.30</a></p> <p>4 Cornish, R. P., John, A., Boyd, A., Tilling, K., &amp; Macleod, J. (2016). Defining adolescent common mental disorders using electronic primary care data: A comparison with outcomes measured using the CIS-R. <i>BMJ Open</i>, 6(12). <a href="https://doi.org/10.1136/bmjopen-2016-013167">https://doi.org/10.1136/bmjopen-2016-013167</a>;</p> <p>4a John, A., Marchant, A. L., Fone, D. L., McGregor, J. I., Dennis, M. S., Tan, J. O. A., &amp; Lloyd, K. (2016). Recent trends in primary-care antidepressant prescribing to children and young people: an e-cohort study. <i>Psychological Medicine</i>, 46(16), 3315–3327. <a href="https://doi.org/10.1017/S0033291716002099">https://doi.org/10.1017/S0033291716002099</a></p> <p>5 John, Ann, McGregor, J., Jones, I., Lee, S. C., Walters, J. T. R., Owen, M. J., O’Donovan, M., DelPozo-Banos, M., Berridge, D., &amp; Lloyd, K. (2018). Premature mortality among people with severe mental illness — New evidence from linked primary care data. <i>Schizophrenia Research</i>, 199, 154–162. <a href="https://doi.org/10.1016/j.schres.2018.04.009">https://doi.org/10.1016/j.schres.2018.04.009</a></p> <p>6 John, Ann, Wood, S., Rees, S., Wang, T., &amp; Marchant, A. (2019). Mental Healthcare in Young People and Young Adults. <a href="https://www.ncepod.org.uk/2019ypmh.html">https://www.ncepod.org.uk/2019ypmh.html</a></p> <p>7 Demmler, J. C., Brophy, S. T., Marchant, A., John, A., &amp; Tan, J. O. A. (2019). Shining the light on eating disorders, incidence, prognosis and profiling of patients in primary and secondary care: national data linkage study. <i>The British Journal of Psychiatry</i>, 1–8. <a href="https://doi.org/10.1192/bjp.2019.153">https://doi.org/10.1192/bjp.2019.153</a></p> <p>8 Wood, S., Marchant, A., Allsopp, M., Wilkinson, K., Bethel, J., Jones, H., &amp; John, A. (2019). Epidemiology of eating disorders in primary care in children and young people: a Clinical Practice Research Datalink study in England. <i>BMJ Open</i>, 9(8), e026691. <a href="https://doi.org/10.1136/bmjopen-2018-026691">https://doi.org/10.1136/bmjopen-2018-026691</a></p> <p>9 Thomas, K. H., Davies, N., Metcalfe, C., Windmeijer, F., Martin, R. M., &amp; Gunnell, D. (2013). Validation of suicide and self-harm records in the clinical practice research datalink. <i>British Journal of Clinical Pharmacology</i>, 76(1), 145–157. <a href="https://doi.org/10.1111/bcp.12059">https://doi.org/10.1111/bcp.12059</a></p> <p>10 John, Ann. (2015). Talk to me Annexes – Suicide and Self Harm Prevention Strategy and Action Plan for Wales 2015-2020 2. <a href="https://gov.wales/sites/default/files/publications/2019-06/talk-to-me-2-annexes-suicide-and-self-harm-prevention-strategy-and-action-plan-for-wales-2015-2020_0.pdf">https://gov.wales/sites/default/files/publications/2019-06/talk-to-me-2-annexes-suicide-and-self-harm-prevention-strategy-and-action-plan-for-wales-2015-2020_0.pdf</a></p> <p>11 S. Rees, private communication, to be submitted, see p28 below</p> |



**Supplementary table 3: Number of individuals having one or more mental disorders, their sex and statistics for the age at first diagnosis.**

| Mental disorder           | Number of pupils with disorder <sup>1</sup> | Number of girls with disorder <sup>1</sup> | Mode of age at first diagnosis <sup>2</sup> | Inter-quantile 1 | Inter-quantile 3 | Number of people with one disorder | people with comorbidities | People with SEN (% of total) | Number diagnosed after school age (% of total) |
|---------------------------|---------------------------------------------|--------------------------------------------|---------------------------------------------|------------------|------------------|------------------------------------|---------------------------|------------------------------|------------------------------------------------|
| ADHD                      | 8,199                                       | 1,625                                      | 8                                           | 7                | 11               | 4,515                              | 3,684                     | 7196 (88%)                   | 229 (3%)                                       |
| ASD                       | 7,055                                       | 1,516                                      | 9                                           | 6                | 12               | 3,786                              | 3,269                     | 6400 (91%)                   | 357 (5%)                                       |
| Learning difficulties     | 3,867                                       | 1,272                                      | 3                                           | 4                | 11               | 2,303                              | 1,564                     | 3433 (89%)                   | 159 (4%)                                       |
| Conduct disorder          | 4,417                                       | 1,434                                      | 7                                           | 5                | 11               | 2,117                              | 2,300                     | 3041 (69%)                   | 46 (1%)                                        |
| Depression                | 22,888                                      | 15,198                                     | 17                                          | 15               | 18               | 12,141                             | 10,747                    | 7982 (35%)                   | 11710 (50%)                                    |
| Anxiety                   | 19,727                                      | 13,118                                     | 17                                          | 13               | 18               | 11,138                             | 8,589                     | 6662 (34%)                   | 8100 (41%)                                     |
| Eating disorder           | 1,504                                       | 1,320                                      | 15                                          | 13               | 16               | 617                                | 887                       | 404 (27%)                    | 351 (23%)                                      |
| Bipolar disorder          | 164                                         | 132                                        | 19                                          | 16               | 19               | 7                                  | 157                       | 76 (46%)                     | 112 (68%)                                      |
| Schizophrenia             | 217                                         | 80                                         | 18                                          | 16               | 19               | 15                                 | 202                       | 109 (50%)                    | 149 (69%)                                      |
| other psychotic disorders | 327                                         | 159                                        | 18                                          | 15               | 18               | 37                                 | 290                       | 164 (50%)                    | 189 (58%)                                      |
| Drug misuse               | 1,990                                       | 774                                        | 17                                          | 15               | 18               | 454                                | 1,536                     | 1024 (51%)                   | 1069 (54%)                                     |
| Alcohol misuse            | 2,434                                       | 1,313                                      | 15                                          | 14               | 17               | 1,083                              | 1,351                     | 1016 (42%)                   | 845 (35%)                                      |
| Self-harm                 | 8,706                                       | 6,652                                      | 15                                          | 14               | 16               | 2,805                              | 5,901                     | 3631 (42%)                   | 2160 (35%)                                     |

<sup>1</sup> Pupils may have more than one condition

<sup>2</sup> highest number of people with the condition are first diagnosed at this age.

**Supplementary table 4: Odds ratios for absenteeism by sex, age or deprivation in stratified populations that included individuals with each of the mental disorders listed. P<0.0001 unless otherwise specified.**

| MH condition                      | OR (95%CI) (males) p        | OR (95%CI) age p             | OR (95%CI) deprivation (2nd vs 1st quintile), p | OR (95%CI) deprivation (5th vs 1st quintile), p |
|-----------------------------------|-----------------------------|------------------------------|-------------------------------------------------|-------------------------------------------------|
| ADHD (N=8199)                     | <b>0.8 (0.8, 0.9) 4e-04</b> | <b>1.09 (1.08, 1.1)</b>      | <b>1.3 (1.1, 1.6) 6e-04</b>                     | <b>2.2 (1.9, 2.5)</b>                           |
| ASD (N= 7055)                     | <b>0.8 (0.7, 0.9)</b>       | <b>1.01 (1, 1.03) 0.0432</b> | <b>1.3 (1.1, 1.5) 0.0021</b>                    | <b>2.0 (1.7, 2.3)</b>                           |
| Learning difficulties (N= 3867)   | <b>0.8 (0.7, 0.9)</b>       | 1 (0.98, 1.01) 0.7806        | <b>1.5 (1.2, 1.8) 5e-04</b>                     | <b>2.2 (1.8, 2.7)</b>                           |
| Conduct disorder (N= 4417)        | <b>0.8 (0.7, 0.9) 5e-04</b> | <b>1.07 (1.06, 1.09)</b>     | 1.2 (1, 1.5) 0.053                              | <b>1.5 (1.3, 1.9)</b>                           |
| Depression (N=22,888)             | <b>0.8 (0.8, 0.9)</b>       | <b>1.1 (1.09, 1.11)</b>      | <b>1.3 (1.2, 1.4)</b>                           | <b>2.3 (2.2, 2.5)</b>                           |
| Anxiety (N= 19,727)               | 1.0 (0.9, 1.0) 0.072        | <b>1.07 (1.06, 1.08)</b>     | <b>1.5 (1.4, 1.6)</b>                           | <b>2.7 (2.5, 2.9)</b>                           |
| Eating disorders (N=1,504)        | 1.0 (0.8, 1.4) 0.79         | <b>1.13 (1.09, 1.18)</b>     | <b>1.6 (1.2, 2.2) 0.0014</b>                    | <b>2.6 (2.0, 3.5)</b>                           |
| Bipolar disorder (N=164)          | 0.7 (0.4, 1.4) 0.32         | 0.99 (0.85, 1.15) 0.9069     | NA                                              | NA                                              |
| Schizophrenia (N=217)             | 0.8 (0.5, 1.3) 0.38         | 1.11 (0.98, 1.25) 0.0917     | NA                                              | NA                                              |
| Other psychotic disorders (N=327) | <b>0.7 (0.5, 1.0) 0.036</b> | 1.05 (0.96, 1.14) 0.2592     | 0.6 (0.3, 1.2) 0.13                             | 1.4 (0.8, 2.7) 0.26                             |
| Drug misuse (N= 1,990)            | <b>0.6 (0.6, 0.7)</b>       | <b>1.15 (1.1, 1.2)</b>       | 1.3 (1.0, 1.7) 0.096                            | <b>2.1 (1.6, 2.7)</b>                           |
| Alcohol misuse (N= 2,434)         | <b>0.7 (0.6, 0.8)</b>       | <b>1.13 (1.09, 1.17)</b>     | <b>1.5 (1.1, 1.9) 0.0082</b>                    | <b>2.8 (2.2, 3.6)</b>                           |
| Self-harm (N= 8,706)              | 1.0 (0.9, 1.0) 0.29         | <b>1.16 (1.15, 1.18)</b>     | <b>1.3 (1.1, 1.5) 1e-04</b>                     | <b>2.0 (1.8, 2.3)</b>                           |

**Supplementary Table 5: distribution of pupils with comorbidities.**

| <b>Number of morbidities</b> | <b>Number of pupils</b> |
|------------------------------|-------------------------|
| 1                            | 41,018                  |
| 2                            | 12,096                  |
| 3                            | 3,495                   |
| 4                            | 957                     |
| 5                            | 247                     |
| 6                            | 87                      |
| $\geq 7$                     | 30                      |

**Supplementary table 6: Odds ratios for absenteeism in a model adjusted for sex, age deprivation and the number of comorbidities as a variable.**

| MH condition                | OR (95%CI) adjusted for sex, age, deprivation and comorbidities | OR (95%CI) for the comorbidity covariate |
|-----------------------------|-----------------------------------------------------------------|------------------------------------------|
| ADHD                        | 1.3 (1.2, 1.4)                                                  | 1.3 (1.2, 1.3)                           |
| ASD                         | 1.2 (1.1, 1.3)                                                  | 1.3 (1.3, 1.4)                           |
| Learning difficulties       | 1.4 (1.3, 1.6)                                                  | 1.2 (1.2, 1.3)                           |
| Conduct disorder            | 1.7 (1.6, 1.9)                                                  | 1.2 (1.2, 1.3)                           |
| Depression                  | 1.8 (1.8, 1.9)                                                  | 1.3 (1.3, 1.3)                           |
| Anxiety                     | 1.4 (1.3, 1.5)                                                  | 1.4 (1.4, 1.5)                           |
| Eating disorder             | 1.1 (0.9, 1.3) p=0.3                                            | 1.4 (1.3, 1.5)                           |
| Bipolar disorder            | 5.4 (2.7, 10.6)                                                 | 1.0 (0.9, 1.2)                           |
| Schizophrenia               | 2.6 (1.5, 4.7) p=0.001                                          | 1.2 (1.0, 1.3)                           |
| Other psychiatric disorders | 1.8 (1.1, 2.8) p=0.02                                           | 1.2 (1.1, 1.3)                           |
| Drug misuse                 | 2.8 (2.4, 3.3)                                                  | 1.2 (1.1, 1.2)                           |
| Alcohol misuse              | 1.8 (1.6, 2.1)                                                  | 1.3 (1.2, 1.4)                           |
| Self-harm                   | 2.3 (2.1, 2.4)                                                  | 1.2 (1.2, 1.3)                           |

**Supplementary table 7: Odds ratios for absenteeism in a model adjusted for sex, age deprivation with interaction between SEN status and mental disorder. P<0.0001 unless otherwise specified.**

| MH condition                      | adjusted for sex, age, deprivation and interaction with SEN | OR (95%CI) for SEN covariate | OR (95%CI) SEN x EVENT    |
|-----------------------------------|-------------------------------------------------------------|------------------------------|---------------------------|
| ADHD (N=8199)                     | 2.2 (2.0, 2.4)                                              | 1.6 (1.6, 1.6)               | 0.65 (0.59, 0.71)         |
| ASD (N= 7055)                     | 2.4 (2.2, 2.6)                                              | 1.6 (1.6, 1.6)               | 0.59 (0.54, 0.66) p=0.008 |
| Learning difficulties (N= 3867)   | 1.8 (1.6, 2.1)                                              | 1.6 (1.6, 1.6)               | 0.82 (0.71, 0.95)         |
| Conduct disorder (N= 4417)        | 2.9 (2.7, 3.1)                                              | 1.6 (1.6, 1.6)               | 0.67 (0.61, 0.73)         |
| Depression (N=22,888)             | 2.8 (2.8, 2.9)                                              | 1.6 (1.6, 1.6)               | 0.89 (0.85, 0.94)         |
| Anxiety (N= 19,727)               | 2.4 (2.3, 2.5)                                              | 1.6 (1.6, 1.6)               | 1.0 (0.95, 1.05) p=0.8    |
| Eating disorders (N=1,504)        | 2.1 (1.9, 2.3)                                              | 1.6 (1.6, 1.6)               | 1.07 (0.89, 1.28) p=0.5   |
| Bipolar disorder (N=164)          | 6.1 (4.4, 8.6)                                              | 1.6 (1.6, 1.6)               | 0.61 (0.38, 0.98) p=0.04  |
| Schizophrenia (N=217)             | 4.6 (3.4, 6.1)                                              | 1.6 (1.6, 1.6)               | 0.68 (0.44, 1.04) p=0.07  |
| Other psychotic disorders (N=327) | 3.4 (2.7, 4.3)                                              | 1.6 (1.6, 1.6)               | 0.7 (0.51, 0.97)          |
| Drug misuse (N= 1,990)            | 4.2 (3.8, 4.7)                                              | 1.6 (1.6, 1.6)               | 0.78 (0.68, 0.9)          |
| Alcohol misuse (N= 2,434)         | 3.2 (2.9, 3.5)                                              | 1.6 (1.6, 1.6)               | 0.92 (0.81, 1.05) p=0.2   |
| Self-harm (N= 8,706)              | 3.5 (3.3, 3.6)                                              | 1.6 (1.6, 1.6)               | 0.82 (0.76, 0.87)         |

**Supplementary table 8: Odds ratios for exclusion by sex, age or deprivation in stratified populations that included individuals with each of the mental disorders listed. P<0.0001 unless otherwise specified. NA means not enough individuals. In the population with no disorder OR for males was 3.3, OR for age was 1.3, for quintile 2 OR=1.6, for quintile 5 OR=4.7**

| MH condition                      | OR (95%CI) (males) p | OR (95%CI) age p       | OR (95%CI) deprivation (2nd vs 1st quintile), p | OR (95%CI) deprivation (5th vs 1st quintile), p |
|-----------------------------------|----------------------|------------------------|-------------------------------------------------|-------------------------------------------------|
| ADHD (N=8199)                     | 1.5 (1.3, 1.8)       | 1.12 (1.1, 1.14)       | 1.2 (0.9, 1.5) 0.2                              | 1.8 (1.5, 2.2)                                  |
| ASD (N= 7055)                     | 1.8 (1.4, 2.3)       | 1.09 (1.06, 1.12)      | 1.2 (0.8, 1.7) 0.3                              | 1.9 (1.4, 2.5)                                  |
| Learning difficulties (N= 3867)   | 2.1 (1.5, 3)         | 1.15 (1.1, 1.2)        | 1.1 (0.7, 2) 0.6                                | 1.8 (1.1, 3.0) 0.02                             |
| Conduct disorder (N= 4417)        | 1.7 (1.4, 2.1)       | 1.13 (1.1, 1.15)       | 1.0 (0.7, 1.4) 0.9                              | 1.4 (1.1, 1.9) 0.02                             |
| Depression (N=22,888)             | 1.9 (1.7, 2.1)       | 1.12 (1.1, 1.14)       | 1.2 (1, 1.4) 0.09                               | 2.3 (2.0, 2.7)                                  |
| Anxiety (N= 19,727)               | 2.0 (1.8, 2.2)       | 1.17 (1.15, 1.2)       | 1.3 (1, 1.7) 0.03                               | 3.3 (2.7, 4.0)                                  |
| Eating disorders (N=1,504)        | 2.3 (1.3, 4.2) 0.006 | 1.19 (1.08, 1.3) 3e-04 | 0.3 (0.1, 1.1) 0.08                             | 2.8 (1.3, 6.0) 0.008                            |
| Bipolar disorder (N=164)          | 2.0 (0.9, 4.7) 0.09  | 0.87 (0.73, 1.05) 0.1  | NA                                              | NA                                              |
| Schizophrenia (N=217)             | 2.2 (1.1, 4.6) 0.04  | 0.96 (0.84, 1.09) 0.5  | NA                                              | NA                                              |
| Other psychotic disorders (N=327) | 2.9 (1.5, 5.9) 0.003 | 1.1 (0.99, 1.22) 0.08  | 1.6 (0.5, 4.7) 0.4                              | 0.7 (0.2, 2.0) 0.5                              |
| Drugs misuse (N= 1,990)           | 1.4 (1.2, 1.7)       | 1.03 (0.99, 1.08) 0.1  | 1.0 (0.7, 1.3) 0.8                              | 1.5 (1.1, 2.0) 0.006                            |
| Alcohol misuse (N= 2,434)         | 1.4 (1.1, 1.6) 0.002 | 1.01 (0.97, 1.04) 0.8  | 1.2 (0.8, 1.9) 0.4                              | 2.5 (1.7, 3.6)                                  |
| Self-harm (N= 8,706)              | 2.5 (2.2, 2.8)       | 1.12 (1.09, 1.14)      | 1.1 (0.8, 1.3) 0.7                              | 1.7 (1.4, 2.1)                                  |

**Supplementary table 9: Odds ratios for exclusion in a model adjusted for sex, age deprivation and the number of comorbidities. P<0.0001 unless otherwise specified.**

| <b>MH condition</b>                        | <b>OR (95%CI) adjusted for sex, age, deprivation and comorbidities</b> | <b>OR (95%CI) for the comorbidity covariate</b> |
|--------------------------------------------|------------------------------------------------------------------------|-------------------------------------------------|
| ADHD ( <i>N</i> =8199)                     | 4.2 (3.7, 4.6)                                                         | 1.2 (1.2, 1.3)                                  |
| ASD ( <i>N</i> = 7055)                     | 1.3 (1.1, 1.5) p=0.004                                                 | 1.4 (1.3, 1.5)                                  |
| Learning difficulties ( <i>N</i> = 3867)   | 0.6 (0.5, 0.9) p=0.002                                                 | 1.7 (1.5, 1.8)                                  |
| Conduct disorder ( <i>N</i> = 4417)        | 3.3 (2.9, 3.9)                                                         | 1.3 (1.3, 1.4)                                  |
| Depression ( <i>N</i> =22,888)             | 1.4 (1.3, 1.5)                                                         | 1.6 (1.5, 1.6)                                  |
| Anxiety ( <i>N</i> = 19,727)               | 0.8 (0.7, 0.9)                                                         | 1.8 (1.7, 1.9)                                  |
| Eating disorders ( <i>N</i> =1,504)        | 1.0 (0.6, 1.6) p=0.9                                                   | 1.3 (1.1, 1.5)                                  |
| Bipolar disorder ( <i>N</i> =164)          | 2.9 (1.0, 8.5) p=0.06                                                  | 1.3 (1.0, 1.6)                                  |
| Schizophrenia ( <i>N</i> =217)             | 2.7 (1.0, 6.8) p=0.04                                                  | 1.3 (1.0, 1.6)                                  |
| Other psychotic disorders ( <i>N</i> =327) | 1.9 (0.8, 4.3) p=0.1                                                   | 1.3 (1.0, 1.6)                                  |
| Drug misuse ( <i>N</i> = 1,990)            | 7.5 (6.2, 9.1)                                                         | 1.2 (1.1, 1.2)                                  |
| Alcohol misuse ( <i>N</i> = 2,434)         | 2.8 (2.3, 3.4)                                                         | 1.4 (1.3, 1.5)                                  |
| Self-harm ( <i>N</i> = 8,706)              | 3.6 (3.2, 4.1)                                                         | 1.3 (1.2, 1.4)                                  |

**Table 10: Odds ratios of exclusions for a model with interaction between SEN status and disorder. p<0.0001 unless otherwise specified.**

| MH condition                               | OR (95%CI) adjusted for sex, age, deprivation and interaction with SEN | OR (95%CI) for SEN covariate | OR (95%CI) SEN x EVENT     |
|--------------------------------------------|------------------------------------------------------------------------|------------------------------|----------------------------|
| ADHD ( <i>N</i> =8199)                     | 7.1 (6.2, 8.2)                                                         | 2.9 (2.8, 3)                 | 0.48 (0.41, 0.56)          |
| ASD ( <i>N</i> = 7055)                     | 2.9 (2.2, 3.7)                                                         | 2.9 (2.8, 3)                 | 0.51 (0.38, 0.67)          |
| Learning difficulties ( <i>N</i> = 3867)   | 1.4 (0.9, 2.3) p=0.1                                                   | 2.9 (2.8, 3)                 | 0.69 (0.43, 1.11) p=0.1    |
| Conduct disorder ( <i>N</i> = 4417)        | 5.4 (4.7, 6.3)                                                         | 2.9 (2.8, 3)                 | 0.73 (0.61, 0.88)          |
| Depression ( <i>N</i> =22,888)             | 3.2 (2.9, 3.4)                                                         | 2.9 (2.8, 3.1)               | 0.83 (0.76, 0.92) p=0.0002 |
| Anxiety ( <i>N</i> = 19,727)               | 2.3 (2.1, 2.5)                                                         | 2.9 (2.8, 3)                 | 0.9 (0.8, 1.02) p=0.09     |
| Eating disorders ( <i>N</i> =1,504)        | 1.8 (1.3, 2.5) p=0.0006                                                | 2.9 (2.8, 3)                 | 1.0 (0.61, 1.63) p=1       |
| Bipolar disorder ( <i>N</i> =164)          | 10.6 (5.9, 19)                                                         | 2.9 (2.8, 3)                 | 0.32 (0.15, 0.71) p=0.005  |
| Schizophrenia ( <i>N</i> =217)             | 7.5 (4.4, 12.6)                                                        | 2.9 (2.8, 3)                 | 0.55 (0.29, 1.03) p=0.06   |
| Other psychotic disorders ( <i>N</i> =327) | 5.6 (3.5, 9)                                                           | 2.9 (2.8, 3)                 | 0.41 (0.21, 0.8) 0.009     |
| Drug misuse ( <i>N</i> = 1,990)            | 12.2 (10.7, 14.0)                                                      | 2.9 (2.8, 3)                 | 0.6 (0.5, 0.71)            |
| Alcohol misuse ( <i>N</i> = 2,434)         | 6.1 (5.2, 7.1)                                                         | 2.9 (2.8, 3)                 | 0.83 (0.67, 1.02) p=0.07   |
| Self-harm ( <i>N</i> = 8,706)              | 6.9 (6.3, 7.5)                                                         | 2.9 (2.8, 3)                 | 0.69 (0.62, 0.78)          |



Supplementary table 11: Numbers of pupils and of absentees per year group and disorder. These counts were used to create figure 2.

| <b>Disorder</b> | <b>Age (years, as proxy for school year groups)</b> | <b>Absentees (N)</b> | <b>Total (N)</b> |
|-----------------|-----------------------------------------------------|----------------------|------------------|
| ADHD            | 7                                                   | 415                  | 2,035            |
|                 | 8                                                   | 435                  | 2,317            |
|                 | 9                                                   | 514                  | 2,437            |
|                 | 10                                                  | 496                  | 2,468            |
|                 | 11                                                  | 547                  | 2,517            |
|                 | 12                                                  | 600                  | 2,480            |
|                 | 13                                                  | 747                  | 2,457            |
|                 | 14                                                  | 801                  | 2,410            |
|                 | 15                                                  | 823                  | 2,463            |
|                 | 16                                                  | 806                  | 2,299            |
| Alcohol misuse  | 8                                                   | 6                    | 22               |
|                 | 9                                                   | 18                   | 72               |
|                 | 10                                                  | 40                   | 165              |
|                 | 11                                                  | 85                   | 317              |
|                 | 12                                                  | 152                  | 513              |
|                 | 13                                                  | 245                  | 740              |
|                 | 14                                                  | 399                  | 1,013            |
|                 | 15                                                  | 583                  | 1,389            |
| Anxiety         | 7                                                   | 166                  | 801              |
|                 | 8                                                   | 341                  | 1,448            |
|                 | 9                                                   | 591                  | 2,262            |
|                 | 10                                                  | 776                  | 3,184            |
|                 | 11                                                  | 1,016                | 4,169            |
|                 | 12                                                  | 1,369                | 5,359            |

|                  |    |       |        |
|------------------|----|-------|--------|
|                  | 13 | 2,029 | 6,735  |
|                  | 14 | 2,770 | 8,311  |
|                  | 15 | 3,421 | 10,358 |
|                  | 16 | 4,085 | 12,133 |
| ASD              | 7  | 483   | 2,016  |
|                  | 8  | 458   | 2,079  |
|                  | 9  | 517   | 2,178  |
|                  | 10 | 500   | 2,167  |
|                  | 11 | 552   | 2,236  |
|                  | 12 | 507   | 2,118  |
|                  | 13 | 565   | 2,056  |
|                  | 14 | 553   | 1,957  |
|                  | 15 | 513   | 1,940  |
|                  | 16 | 480   | 1,766  |
| Bipolar disorder | 13 | 23    | 41     |
|                  | 14 | 31    | 59     |
|                  | 15 | 49    | 90     |
|                  | 16 | 66    | 131    |
| Conduct disorder | 7  | 244   | 957    |
|                  | 8  | 285   | 1,155  |
|                  | 9  | 333   | 1,241  |
|                  | 10 | 333   | 1,273  |
|                  | 11 | 346   | 1,332  |
|                  | 12 | 408   | 1,340  |
|                  | 13 | 546   | 1,404  |
|                  | 14 | 590   | 1,402  |
|                  | 15 | 618   | 1,472  |
|                  | 16 | 533   | 1,416  |
| Depression       | 7  | 63    | 232    |
|                  | 8  | 139   | 544    |

|                       |    |       |        |
|-----------------------|----|-------|--------|
|                       | 9  | 284   | 1,126  |
|                       | 10 | 508   | 2,105  |
|                       | 11 | 811   | 3,291  |
|                       | 12 | 1,240 | 4,968  |
|                       | 13 | 2,345 | 7,148  |
|                       | 14 | 3,627 | 9,755  |
|                       | 15 | 4,989 | 13,299 |
|                       | 16 | 6,327 | 16,351 |
| Drug misuse           | 9  | 9     | 37     |
|                       | 10 | 27    | 90     |
|                       | 11 | 55    | 183    |
|                       | 12 | 114   | 338    |
|                       | 13 | 247   | 581    |
|                       | 14 | 379   | 838    |
|                       | 15 | 554   | 1,195  |
|                       | 16 | 680   | 1,404  |
| Eating disorder       | 7  | 6     | 31     |
|                       | 8  | 15    | 74     |
|                       | 9  | 27    | 138    |
|                       | 10 | 37    | 229    |
|                       | 11 | 61    | 327    |
|                       | 12 | 69    | 462    |
|                       | 13 | 141   | 591    |
|                       | 14 | 209   | 694    |
|                       | 15 | 253   | 844    |
|                       | 16 | 288   | 906    |
| Learning difficulties | 7  | 258   | 1,011  |
|                       | 8  | 266   | 1,080  |
|                       | 9  | 300   | 1,132  |
|                       | 10 | 255   | 1,115  |

|                           |    |        |         |
|---------------------------|----|--------|---------|
|                           | 11 | 285    | 1,125   |
|                           | 12 | 225    | 1,045   |
|                           | 13 | 284    | 1,111   |
|                           | 14 | 315    | 1,086   |
|                           | 15 | 296    | 1,155   |
|                           | 16 | 325    | 1,168   |
| No disorder               | 7  | 15,493 | 120,672 |
|                           | 8  | 14,584 | 119,454 |
|                           | 9  | 14,316 | 115,874 |
|                           | 10 | 13,688 | 110,894 |
|                           | 11 | 12,708 | 105,854 |
|                           | 12 | 12,064 | 101,752 |
|                           | 13 | 15,589 | 98,944  |
|                           | 14 | 16,879 | 96,151  |
|                           | 15 | 16,772 | 95,929  |
|                           | 16 | 17,389 | 93,907  |
| Other psychotic disorders | 10 | 8      | 23      |
|                           | 11 | 11     | 40      |
|                           | 12 | 15     | 66      |
|                           | 13 | 40     | 106     |
|                           | 14 | 55     | 138     |
|                           | 15 | 67     | 180     |
|                           | 16 | 94     | 227     |
| Schizophrenia             | 11 | 7      | 21      |
|                           | 12 | 15     | 37      |
|                           | 13 | 25     | 56      |
|                           | 14 | 42     | 86      |
|                           | 15 | 53     | 119     |
|                           | 16 | 74     | 159     |
| Self-harm                 | 7  | 34     | 84      |

|  |    |       |       |
|--|----|-------|-------|
|  | 8  | 75    | 264   |
|  | 9  | 158   | 585   |
|  | 10 | 289   | 1,130 |
|  | 11 | 457   | 1,805 |
|  | 12 | 687   | 2,612 |
|  | 13 | 1,242 | 3,417 |
|  | 14 | 1,682 | 4,110 |
|  | 15 | 2,227 | 4,949 |
|  | 16 | 2,380 | 5,158 |

Supplementary table 12: Numbers of pupils and of excluded pupils per year group and disorder. These counts were used to create figure 3.

| <b>Disorder</b> | <b>Age (years, as proxy for school year groups)</b> | <b>Excluded (N)</b> | <b>Total (N)</b> |
|-----------------|-----------------------------------------------------|---------------------|------------------|
| ADHD            | 7                                                   | 72                  | 2,038            |
|                 | 8                                                   | 124                 | 2,343            |
|                 | 9                                                   | 130                 | 2,474            |
|                 | 10                                                  | 135                 | 2,532            |
|                 | 11                                                  | 138                 | 2,570            |
|                 | 12                                                  | 292                 | 2,589            |
|                 | 13                                                  | 356                 | 2,555            |
|                 | 14                                                  | 374                 | 2,483            |
|                 | 15                                                  | 357                 | 2,529            |
| Alcohol misuse  | 16                                                  | 226                 | 2,376            |
|                 | 11                                                  | 9                   | 320              |
|                 | 12                                                  | 45                  | 517              |
|                 | 13                                                  | 89                  | 747              |
|                 | 14                                                  | 150                 | 1,026            |
| Anxiety         | 15                                                  | 197                 | 1,404            |
|                 | 16                                                  | 145                 | 1,741            |
|                 | 8                                                   | 8                   | 1,449            |
|                 | 9                                                   | 22                  | 2,265            |
|                 | 10                                                  | 24                  | 3,190            |
|                 | 11                                                  | 28                  | 4,176            |
|                 | 12                                                  | 90                  | 5,385            |
|                 | 13                                                  | 226                 | 6,775            |
| ASD             | 14                                                  | 356                 | 8,341            |
|                 | 15                                                  | 567                 | 10,388           |
|                 | 16                                                  | 481                 | 12,195           |
|                 | 7                                                   | 38                  | 2,018            |

|                  |    |     |        |
|------------------|----|-----|--------|
|                  | 8  | 64  | 2,123  |
|                  | 9  | 63  | 2,231  |
|                  | 10 | 47  | 2,232  |
|                  | 11 | 45  | 2,288  |
|                  | 12 | 102 | 2,270  |
|                  | 13 | 120 | 2,177  |
|                  | 14 | 126 | 2,045  |
|                  | 15 | 108 | 1,986  |
|                  | 16 | 86  | 1,826  |
| Bipolar disorder | 13 | 7   | 41     |
|                  | 14 | 9   | 59     |
|                  | 15 | 16  | 92     |
|                  | 16 | 7   | 133    |
| Conduct disorder | 7  | 28  | 958    |
|                  | 8  | 51  | 1,160  |
|                  | 9  | 57  | 1,244  |
|                  | 10 | 67  | 1,298  |
|                  | 11 | 55  | 1,348  |
|                  | 12 | 131 | 1,372  |
|                  | 13 | 185 | 1,437  |
|                  | 14 | 207 | 1,433  |
|                  | 15 | 208 | 1,490  |
|                  | 16 | 142 | 1,435  |
| Depression       | 9  | 8   | 1,125  |
|                  | 10 | 18  | 2,107  |
|                  | 11 | 31  | 3,296  |
|                  | 12 | 128 | 4,983  |
|                  | 13 | 351 | 7,173  |
|                  | 14 | 602 | 9,779  |
|                  | 15 | 984 | 13,328 |

|                       |    |       |         |
|-----------------------|----|-------|---------|
|                       | 16 | 835   | 16,437  |
| Drug misuse           | 10 | 6     | 90      |
|                       | 11 | 8     | 183     |
|                       | 12 | 46    | 341     |
|                       | 13 | 123   | 586     |
|                       | 14 | 205   | 848     |
|                       | 15 | 297   | 1,214   |
|                       | 16 | 255   | 1,423   |
| Eating disorder       | 13 | 18    | 593     |
|                       | 14 | 15    | 694     |
|                       | 15 | 20    | 842     |
|                       | 16 | 21    | 916     |
| Learning difficulties | 7  | 9     | 1,014   |
|                       | 8  | 13    | 1,107   |
|                       | 9  | 13    | 1,155   |
|                       | 10 | 20    | 1,154   |
|                       | 11 | 17    | 1,164   |
|                       | 12 | 31    | 1,141   |
|                       | 13 | 45    | 1,189   |
|                       | 14 | 48    | 1,139   |
|                       | 15 | 55    | 1,181   |
|                       | 16 | 40    | 1,207   |
| No disorder           | 7  | 141   | 120,673 |
|                       | 8  | 202   | 119,511 |
|                       | 9  | 286   | 115,670 |
|                       | 10 | 363   | 110,964 |
|                       | 11 | 408   | 105,929 |
|                       | 12 | 1,167 | 101,959 |
|                       | 13 | 1,815 | 99,116  |
|                       | 14 | 2,284 | 96,262  |



|                           |    |       |        |
|---------------------------|----|-------|--------|
|                           | 15 | 2,770 | 95,984 |
|                           | 16 | 2,064 | 94,173 |
| Other psychotic disorders | 13 | 9     | 107    |
|                           | 14 | 17    | 138    |
|                           | 15 | 21    | 182    |
|                           | 16 | 17    | 230    |
| Schizophrenia             | 13 | 7     | 56     |
|                           | 14 | 16    | 87     |
|                           | 15 | 19    | 119    |
|                           | 16 | 21    | 160    |
| Self-harm                 | 9  | 12    | 586    |
|                           | 10 | 12    | 1,133  |
|                           | 11 | 36    | 1,807  |
|                           | 12 | 139   | 2,623  |
|                           | 13 | 311   | 3,439  |
|                           | 14 | 443   | 4,135  |
|                           | 15 | 605   | 4,985  |
|                           | 16 | 379   | 5,207  |

Supplementary table 13: Sensitivity analysis of absenteeism by neurodevelopmental disorder, mental disorder, drugs or alcohol misuse, and self-harm in the cohort that includes people with no linked healthcare data (N= 437,412). All results are highly significant (p<0.0001).

| <b>Mental disorder</b>            | <b>OR (95% CI)</b> | <b>aOR (95% CI) *</b> |
|-----------------------------------|--------------------|-----------------------|
| ADHD (N=8199)                     | 2.2 (2.1, 2.3)     | 2.0 (1.9, 2.1)        |
| ASD (N= 7055)                     | 2.1 (2.0, 2.2)     | 2.0 (1.9, 2.1)        |
| Learning difficulties (N= 3867)   | 2.1 (2.0, 2.3)     | 2.0 (1.9, 2.1)        |
| Conduct disorder (N= 4417)        | 3.0 (2.9, 3.2)     | 2.6 (2.5, 2.8)        |
| Depression (N=22,888)             | 3.4 (3.3, 3.5)     | 2.9 (2.8, 2.9)        |
| Anxiety (N= 19,727)               | 2.8 (2.7, 2.8)     | 2.5 (2.4, 2.6)        |
| Eating disorders (N=1,504)        | 2.2 (2.0, 2.5)     | 2.2 (2.0, 2.4)        |
| Bipolar disorder (N=164)          | 6.5 (5.0, 8.5)     | 5.5 (4.2, 7.3)        |
| Schizophrenia (N=217)             | 5.0 (4.0, 6.2)     | 4.3 (3.4, 5.3)        |
| Other psychotic disorders (N=327) | 3.7 (3.0, 4.4)     | 3.2 (2.6, 3.9)        |
| Drug misuse (N= 1,990)            | 5.0 (4.7, 5.4)     | 4.2 (3.9, 4.5)        |
| Alcohol misuse (N= 2,434)         | 3.9 (3.6, 4.2)     | 3.3 (3.1, 3.5)        |
| Self-harm (N= 8,706)              | 4.0 (3.9, 4.2)     | 3.5 (3.3, 3.6)        |

\*Adjusted for sex, age, and deprivation

Supplementary table 14: Sensitivity analysis of exclusions by neurodevelopmental disorder, mental disorder, drugs or alcohol misuse, and self-harm in the cohort that includes people with no linked healthcare data (N= 437,412). All results are highly significant (p<0.0001). \*Adjusted for sex, age, and deprivation

| <b>Mental disorder</b>            | <b>OR (95% CI)</b> | <b>aOR (95% CI) *</b>     |
|-----------------------------------|--------------------|---------------------------|
| ADHD (N=8199)                     | 9.0 (8.6, 9.6)     | 6.1 (5.7, 6.4)            |
| ASD (N= 7055)                     | 3.6 (3.3, 4.0)     | 2.6 (2.4, 2.9)            |
| Learning difficulties (N= 3867)   | 2.4 (2.1, 2.8)     | 1.8 (1.5, 2.0)<br>P= 0.74 |
| Conduct disorder (N= 4417)        | 8.7 (8.0, 9.4)     | 6.0 (5.5, 6.5)            |
| Depression (N=22,888)             | 5.0 (4.8, 5.3)     | 3.2 (3.1, 3.4)            |
| Anxiety (N= 19,727)               | 3.3 (3.1, 3.5)     | 2.5 (2.3, 2.6)            |
| Eating disorders (N=1,504)        | 1.8 (1.4, 2.3)     | 1.9 (1.5, 2.5)            |
| Bipolar disorder (N=164)          | 10.6 (7.3, 15.4)   | 7.4 (4.9, 11.0)           |
| Schizophrenia (N=217)             | 14.4 (10.5, 19.8)  | 6.6 (4.7, 9.2)            |
| Other psychotic disorders (N=327) | 7.7 (5.6, 10.7)    | 4.2 (3.0, 5.9)            |
| Drug misuse (N= 1,990)            | 22.9 (21.1, 24.9)  | 11.0 (10.0, 12.1)         |
| Alcohol misuse (N= 2,434)         | 11.2 (10.2, 12.4)  | 6.3 (5.7, 7.1)            |
| Self-harm (N= 8,706)              | 8.3 (7.8, 8.8)     | 6.8 (6.3, 7.2)            |

Supplementary table 15: Goodness-of-fit parameter (QIC) for models when sequentially adding covariates.

| <b>model</b>                       | <b>QIC (exclusions)</b> | <b>QIC (absenteeism)</b> |
|------------------------------------|-------------------------|--------------------------|
| crude                              | 1153277.45              | 229837.28                |
| Adjusted for sex                   | 1153250.90              | 225699.66                |
| Adjusted for sex, Age              | 1148765.23              | 217717.50                |
| Adjusted for sex, Age, deprivation | 1122861.9               | 213823.2                 |

### **Substance misuse - Read v2 codes**

We compiled a list of Read v2 codes with advice from a specialist substance misuse nurse based in a GP practice and with expertise in using Read v2 codes to record SUD. We browsed Read code reference data to identify any missing codes. The code list included codes for diagnoses, symptoms/observations, medications, behaviors (e.g., 'injecting drug user'), referrals and contacts with other services. We included codes that on their own designated CC. We included codes designating misuse of alcohol or illegal drugs but not prescribed medication or tobacco. We also included codes designating a MHD due to substance use, which we classified as designating a CC without the requirement for an associated MHD code.

We included only those prescriptions which were relevant to substance use or addiction treatment: prescription of disulfiram, naltrexone, lofexidine, acamprosate and methadone without associated value of units. The final Read v2 SUD code list (including codes designating a history of a condition) contained 876 codes:

- 167 alcohol codes
- 566 drug codes
- 143 CC codes
- Of the above codes, 80 refer to a history of a SUD

### **Substance use disorders ICD10 codes:**

ICD10 codes were initially identified by cross-mapping the Read code list with ICD10 reference data. The ICD10 SUD code list contained 221 codes:

- 68 alcohol codes
- 54 drug codes
- 99 CC codes

## **Deprivation scores**

Assigning a yearly deprivation score: our dataset includes information on the deprivation level and time periods at that level for each individual. When deprivation data were available for a given academic year we used it, and if a pupil moved between quintiles, we used a time weighted mean. Where deprivation scores were available for a pupil but not for some academic years, we imputed a weighted mean from available years. If deprivation scores were not available for any of the academic years but was available before or after our time-period of focus, we imputed a weighted mean of available deprivation scores into all available academic years.

The RECORD statement – checklist of items, extended from the STROBE statement, that should be reported in observational studies using routinely collected health data.

|                           | Item No. | STROBE items                                                                                                                                                                               | Location in manuscript where items are reported | RECORD items                                                                                                                                                                                                                                                                                                                                                                                                                                       | Location in manuscript where items are reported |
|---------------------------|----------|--------------------------------------------------------------------------------------------------------------------------------------------------------------------------------------------|-------------------------------------------------|----------------------------------------------------------------------------------------------------------------------------------------------------------------------------------------------------------------------------------------------------------------------------------------------------------------------------------------------------------------------------------------------------------------------------------------------------|-------------------------------------------------|
| <b>Title and abstract</b> |          |                                                                                                                                                                                            |                                                 |                                                                                                                                                                                                                                                                                                                                                                                                                                                    |                                                 |
|                           | 1        | (a) Indicate the study's design with a commonly used term in the title or the abstract (b) Provide in the abstract an informative and balanced summary of what was done and what was found |                                                 | <p>RECORD 1.1: The type of data used should be specified in the title or abstract. When possible, the name of the databases used should be included.</p> <p>RECORD 1.2: If applicable, the geographic region and timeframe within which the study took place should be reported in the title or abstract.</p> <p>RECORD 1.3: If linkage between databases was conducted for the study, this should be clearly stated in the title or abstract.</p> | Title and abstract (p2)                         |
| <b>Introduction</b>       |          |                                                                                                                                                                                            |                                                 |                                                                                                                                                                                                                                                                                                                                                                                                                                                    |                                                 |
| Background rationale      | 2        | Explain the scientific background and rationale for the investigation being reported                                                                                                       |                                                 |                                                                                                                                                                                                                                                                                                                                                                                                                                                    | Abstract and introduction(p2, p3)               |

|                |   |                                                                                                                                                                                                                                                                                                                                                                                                                                                                                          |  |                                                                                                                                                                                                                                                                                                                                                                                                                                                                                                                                            |                                                                          |
|----------------|---|------------------------------------------------------------------------------------------------------------------------------------------------------------------------------------------------------------------------------------------------------------------------------------------------------------------------------------------------------------------------------------------------------------------------------------------------------------------------------------------|--|--------------------------------------------------------------------------------------------------------------------------------------------------------------------------------------------------------------------------------------------------------------------------------------------------------------------------------------------------------------------------------------------------------------------------------------------------------------------------------------------------------------------------------------------|--------------------------------------------------------------------------|
| Objectives     | 3 | State specific objectives, including any prespecified hypotheses                                                                                                                                                                                                                                                                                                                                                                                                                         |  |                                                                                                                                                                                                                                                                                                                                                                                                                                                                                                                                            | Introduction (p2)                                                        |
| <b>Methods</b> |   |                                                                                                                                                                                                                                                                                                                                                                                                                                                                                          |  |                                                                                                                                                                                                                                                                                                                                                                                                                                                                                                                                            |                                                                          |
| Study Design   | 4 | Present key elements of study design early in the paper                                                                                                                                                                                                                                                                                                                                                                                                                                  |  |                                                                                                                                                                                                                                                                                                                                                                                                                                                                                                                                            | Methods, design p3                                                       |
| Setting        | 5 | Describe the setting, locations, and relevant dates, including periods of recruitment, exposure, follow-up, and data collection                                                                                                                                                                                                                                                                                                                                                          |  |                                                                                                                                                                                                                                                                                                                                                                                                                                                                                                                                            | Study population, Data sources sections (p2,3)                           |
| Participants   | 6 | <p><i>(a) Cohort study</i> - Give the eligibility criteria, and the sources and methods of selection of participants. Describe methods of follow-up</p> <p><i>Case-control study</i> - Give the eligibility criteria, and the sources and methods of case ascertainment and control selection. Give the rationale for the choice of cases and controls</p> <p><i>Cross-sectional study</i> - Give the eligibility criteria, and the sources and methods of selection of participants</p> |  | <p>RECORD 6.1: The methods of study population selection (such as codes or algorithms used to identify subjects) should be listed in detail. If this is not possible, an explanation should be provided.</p> <p>RECORD 6.2: Any validation studies of the codes or algorithms used to select the population should be referenced. If validation was conducted for this study and not published elsewhere, detailed methods and results should be provided.</p> <p>RECORD 6.3: If the study involved linkage of databases, consider use</p> | <p>Measures section</p> <p>Figure 1 is a flow diagram for the cohort</p> |



|                              |    |                                                                                                                                                                                                                                     |  |                                                                                                                                                                                                                 |                                                      |
|------------------------------|----|-------------------------------------------------------------------------------------------------------------------------------------------------------------------------------------------------------------------------------------|--|-----------------------------------------------------------------------------------------------------------------------------------------------------------------------------------------------------------------|------------------------------------------------------|
|                              |    | <p><i>(b) Cohort study</i> - For matched studies, give matching criteria and number of exposed and unexposed</p> <p><i>Case-control study</i> - For matched studies, give matching criteria and the number of controls per case</p> |  | of a flow diagram or other graphical display to demonstrate the data linkage process, including the number of individuals with linked data at each stage.                                                       |                                                      |
| Variables                    | 7  | Clearly define all outcomes, exposures, predictors, potential confounders, and effect modifiers. Give diagnostic criteria, if applicable.                                                                                           |  | RECORD 7.1: A complete list of codes and algorithms used to classify exposures, outcomes, confounders, and effect modifiers should be provided. If these cannot be reported, an explanation should be provided. | Appendix p7                                          |
| Data sources/<br>measurement | 8  | For each variable of interest, give sources of data and details of methods of assessment (measurement). Describe comparability of assessment methods if there is more than one group                                                |  |                                                                                                                                                                                                                 | Appendix p6                                          |
| Bias                         | 9  | Describe any efforts to address potential sources of bias                                                                                                                                                                           |  |                                                                                                                                                                                                                 | Discussion                                           |
| Study size                   | 10 | Explain how the study size was arrived at                                                                                                                                                                                           |  |                                                                                                                                                                                                                 | Measures and Results/Cohort development/study cohort |

|                                  |    |                                                                                                                                                                                                                                                                                                                                                                                                                                                                                                                                                                      |  |                                                                                              |                                                                                                                                                                                |
|----------------------------------|----|----------------------------------------------------------------------------------------------------------------------------------------------------------------------------------------------------------------------------------------------------------------------------------------------------------------------------------------------------------------------------------------------------------------------------------------------------------------------------------------------------------------------------------------------------------------------|--|----------------------------------------------------------------------------------------------|--------------------------------------------------------------------------------------------------------------------------------------------------------------------------------|
| Quantitative variables           | 11 | Explain how quantitative variables were handled in the analyses. If applicable, describe which groupings were chosen, and why                                                                                                                                                                                                                                                                                                                                                                                                                                        |  |                                                                                              | Measures/covariates, outcome, explanatory variables                                                                                                                            |
| Statistical methods              | 12 | (a) Describe all statistical methods, including those used to control for confounding<br>(b) Describe any methods used to examine subgroups and interactions<br>(c) Explain how missing data were addressed<br>(d) <i>Cohort study</i> - If applicable, explain how loss to follow-up was addressed<br><i>Case-control study</i> - If applicable, explain how matching of cases and controls was addressed<br><i>Cross-sectional study</i> - If applicable, describe analytical methods taking account of sampling strategy<br>(e) Describe any sensitivity analyses |  |                                                                                              | (a) Methods/statistical analysis section p5<br>(b) Methods/statistical analysis section p5<br>(c) Results/cohort development p6<br>(e) Methods/statistical analysis section p5 |
| Data access and cleaning methods |    | ..                                                                                                                                                                                                                                                                                                                                                                                                                                                                                                                                                                   |  | RECORD 12.1: Authors should describe the extent to which the investigators had access to the | Methods/data sources p3                                                                                                                                                        |

|                  |    |                                                                                                                                                                                                                                                                                                                                     |  |                                                                                                                                                                                                                                                                                                                         |                                 |
|------------------|----|-------------------------------------------------------------------------------------------------------------------------------------------------------------------------------------------------------------------------------------------------------------------------------------------------------------------------------------|--|-------------------------------------------------------------------------------------------------------------------------------------------------------------------------------------------------------------------------------------------------------------------------------------------------------------------------|---------------------------------|
|                  |    |                                                                                                                                                                                                                                                                                                                                     |  | <p>database population used to create the study population.</p> <p>RECORD 12.2: Authors should provide information on the data cleaning methods used in the study.</p>                                                                                                                                                  |                                 |
| Linkage          |    | ..                                                                                                                                                                                                                                                                                                                                  |  | <p>RECORD 12.3: State whether the study included person-level, institutional-level, or other data linkage across two or more databases. The methods of linkage and methods of linkage quality evaluation should be provided.</p>                                                                                        | Methods/data sources p3         |
| <b>Results</b>   |    |                                                                                                                                                                                                                                                                                                                                     |  |                                                                                                                                                                                                                                                                                                                         |                                 |
| Participants     | 13 | <p>(a) Report the numbers of individuals at each stage of the study (<i>e.g.</i>, numbers potentially eligible, examined for eligibility, confirmed eligible, included in the study, completing follow-up, and analysed)</p> <p>(b) Give reasons for non-participation at each stage.</p> <p>(c) Consider use of a flow diagram</p> |  | <p>RECORD 13.1: Describe in detail the selection of the persons included in the study (<i>i.e.</i>, study population selection) including filtering based on data quality, data availability and linkage. The selection of included persons can be described in the text and/or by means of the study flow diagram.</p> | Cohort development/study cohort |
| Descriptive data | 14 | <p>(a) Give characteristics of study participants (<i>e.g.</i>, demographic, clinical, social) and information on</p>                                                                                                                                                                                                               |  |                                                                                                                                                                                                                                                                                                                         | Cohort development/study cohort |

|              |    |                                                                                                                                                                                                                                                                                                     |  |  |                        |
|--------------|----|-----------------------------------------------------------------------------------------------------------------------------------------------------------------------------------------------------------------------------------------------------------------------------------------------------|--|--|------------------------|
|              |    | <p>exposures and potential confounders</p> <p>(b) Indicate the number of participants with missing data for each variable of interest</p> <p>(c) <i>Cohort study</i> - summarise follow-up time (e.g., average and total amount)</p>                                                                |  |  |                        |
| Outcome data | 15 | <p><i>Cohort study</i> - Report numbers of outcome events or summary measures over time</p> <p><i>Case-control study</i> - Report numbers in each exposure category, or summary measures of exposure</p> <p><i>Cross-sectional study</i> - Report numbers of outcome events or summary measures</p> |  |  | Table 1, table 2.      |
| Main results | 16 | <p>(a) Give unadjusted estimates and, if applicable, confounder-adjusted estimates and their precision (e.g., 95% confidence interval). Make clear which confounders were adjusted for and why they were included</p>                                                                               |  |  | Results, supplementary |

|                   |    |                                                                                                                                                                                               |  |                                                                                                                                                                                                                                                                                                          |                           |
|-------------------|----|-----------------------------------------------------------------------------------------------------------------------------------------------------------------------------------------------|--|----------------------------------------------------------------------------------------------------------------------------------------------------------------------------------------------------------------------------------------------------------------------------------------------------------|---------------------------|
|                   |    | (b) Report category boundaries when continuous variables were categorized<br>(c) If relevant, consider translating estimates of relative risk into absolute risk for a meaningful time period |  |                                                                                                                                                                                                                                                                                                          |                           |
| Other analyses    | 17 | Report other analyses done—e.g., analyses of subgroups and interactions, and sensitivity analyses                                                                                             |  |                                                                                                                                                                                                                                                                                                          | results                   |
| <b>Discussion</b> |    |                                                                                                                                                                                               |  |                                                                                                                                                                                                                                                                                                          |                           |
| Key results       | 18 | Summarise key results with reference to study objectives                                                                                                                                      |  |                                                                                                                                                                                                                                                                                                          | First paragraph           |
| Limitations       | 19 | Discuss limitations of the study, taking into account sources of potential bias or imprecision. Discuss both direction and magnitude of any potential bias                                    |  | RECORD 19.1: Discuss the implications of using data that were not created or collected to answer the specific research question(s). Include discussion of misclassification bias, unmeasured confounding, missing data, and changing eligibility over time, as they pertain to the study being reported. | Strengths and limitations |
| Interpretation    | 20 | Give a cautious overall interpretation of results considering objectives, limitations, multiplicity of analyses, results from similar                                                         |  |                                                                                                                                                                                                                                                                                                          | Discussion, conclusion    |

|                                                           |    |                                                                                                                                                               |  |                                                                                                                                                          |                                                |
|-----------------------------------------------------------|----|---------------------------------------------------------------------------------------------------------------------------------------------------------------|--|----------------------------------------------------------------------------------------------------------------------------------------------------------|------------------------------------------------|
|                                                           |    | studies, and other relevant evidence                                                                                                                          |  |                                                                                                                                                          |                                                |
| Generalisability                                          | 21 | Discuss the generalisability (external validity) of the study results                                                                                         |  |                                                                                                                                                          | Implications for policy, practice and research |
| <b>Other Information</b>                                  |    |                                                                                                                                                               |  |                                                                                                                                                          |                                                |
| Funding                                                   | 22 | Give the source of funding and the role of the funders for the present study and, if applicable, for the original study on which the present article is based |  |                                                                                                                                                          | Funding and acknowledgement                    |
| Accessibility of protocol, raw data, and programming code |    | ..                                                                                                                                                            |  | RECORD 22.1: Authors should provide information on how to access any supplemental information such as the study protocol, raw data, or programming code. | Data sharing statement                         |

\*Reference: Benchimol EI, Smeeth L, Guttman A, Harron K, Moher D, Petersen I, Sørensen HT, von Elm E, Langan SM, the RECORD Working Committee. The REporting of studies Conducted using Observational Routinely-collected health Data (RECORD) Statement. *PLoS Medicine* 2015; in press.

\*Checklist is protected under Creative Commons Attribution ([CC BY](https://creativecommons.org/licenses/by/4.0/)) license.
